# Supplementary material for: Epidemiology and genetic characteristics of murine kobuvirus from faecal samples of Rattus losea, Rattus tanezumi and Rattus norvegicus in southern China
Source: PubMed Central journal article supplement — J Gen Virol. 2021 Sep 6;102(9):001646. doi: 10.1099/jgv.0.001646 (PMC8567428; doi:10.1099/jgv.0.001646), 2021-09-06
Supplement: jgv-102-1646-s001.pdf [file jgv-102-1646-s001.pdf]

## Supplementary Material

**Table S1 Information for primer sequences**

| Reaction number | Primer name | Primer sequences (5'-3') | Size of PCR products (bp) |
|-----------------|-------------|--------------------------|---------------------------|
| 1               | MuKV-181-F  | TCCTGACTCCCACGGGTTGACC   | 1065                      |
|                 | MuKV-1224-R | TTGGTGGTGGGAATTGCCCTGGC  |                           |
| 2               | MuKV-771-F  | CTGCTGTYGCTGCCTCCTCCAC   | 1180                      |
|                 | MuKV-1929-R | GGGTACGCACGCACGAAGGARA   |                           |
| 3               | MuKV-1797-F | CCACYGGCTGGAACCTTGCAGG   | 1498                      |
|                 | MuKV-3273-R | ATGGCAGCAAGACCAGARGTRT   |                           |
| 4               | MuKV-2570-F | CCAGTYTCCCCAAGCGCCATTG   | 1198                      |
|                 | MuKV-3746-R | CCGCGACRGTCTTCTCTGGAGA   |                           |
| 5               | MuKV-3349-F | WAACCCCAATGGTCTCCCAGTC   | 1170                      |
|                 | MuKV-4497-R | ACAGACATGGGGGTAGGAGARC   |                           |
| 6               | MuKV-4101-F | CATTGGCTCTCGGAGTCGGTGC   | 1460                      |
|                 | MuKV-5539-R | RCGGACCGTGTGGAYTGGAAR    |                           |
| 7               | MuKV-5299-F | CCTCCCCATGGCATCTCTGGAA   | 910                       |
|                 | MuKV-6187-R | GAGAAGGCGGGTRTGGTGGGGT   |                           |
| 8               | MuKV-5936-F | ATYCCCCTTGCCCGCTCYCTTT   | 1325                      |
|                 | MuKV-7239-R | TTGCARCCAACCGCRCAACCAT   |                           |
| 9               | MuKV-6952-F | CGCGGGTTTCCCCTGGAACACC   | 562                       |
|                 | MuKV-7492-R | GGARGTGGCCACACAMCCGGAG   |                           |
| 10              | MuKV-7361-F | GCCTTCWCCCTCGTGGCCAARC   | 890                       |
|                 | MuKV-8229-R | CTCAAAGACAACCCTGGCCCGC   |                           |

R: A/G; Y: C/T; W: A/T; M: A/C

**Table S2** Sample collection and information on MuKV detection

| Region        | <i>Rattus norvegicus</i> |                | <i>Rattus tanezumi</i> |              | <i>Rattus losea</i> |              | Total          |
|---------------|--------------------------|----------------|------------------------|--------------|---------------------|--------------|----------------|
|               | Number of                | Prevalence     | Number of              | Prevalence   | Number of           | Prevalence   |                |
|               | samples                  |                | samples                |              | samples             |              |                |
| <b>Xiamen</b> | 19                       | 21.1% (4/19)   | 18                     | 11.1% (2/18) | 59                  | 10.2% (6/59) | 12.5% (12/96)  |
| <b>Malipo</b> | 47                       | 31.9% (15/47)  | 1                      | 100% (1/1)   | 0                   | -            | 33.3% (16/48)  |
| <b>Yiyang</b> | 80                       | 27.5% (22/80)  | 19                     | 34.6% (6/19) | 0                   | -            | 28.3% (28/99)  |
| <b>Total</b>  | 146                      | 28.1% (41/146) | 38                     | 23.7% (9/38) | 59                  | 10.2% (6/59) | 23.0% (56/243) |

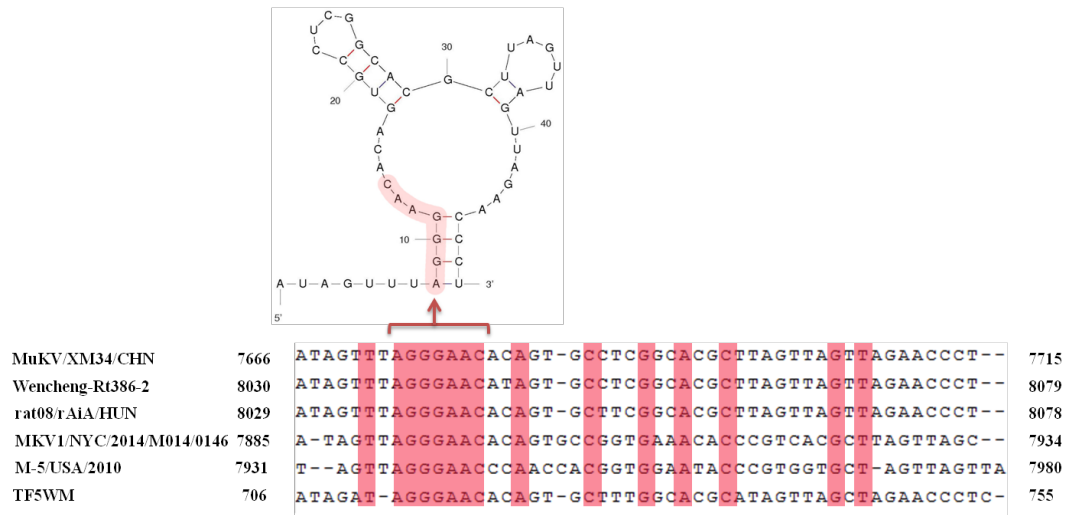

**Figure S1 Predicted barbell-like structure of partial 3'UTR of MuKV/XM34/CHN and sequence alignment of partial 3'UTRs of MuKVs.** The sequence alignment in the 49-nt partial 3'UTRs begins after the stop codon, and the numbers on both sides of the sequences indicate the nucleotide position. The reference *Kobuvirus* sequences include Wencheng-Rt386-2 (accession no. MF352432.1), rat08/rAiA/HUN (accession no. MN116647.1), MKV1/NYC/2014/M014/0146 (accession no. MF175074.1), M-5/USA/2010 (accession no. JF755427.1) and TF5WM (accession no. JQ408726.1).
